# Supplementary material for: Microscopic insight into nanodiamond polymer composites: reinforcement, structural, and interaction properties
Source: Royal Society of Chemistry journal article supplement (doi:10.1039/d0nr07780a), 2020-01-01
Supplement: d0nr07780a1.pdf [file d0nr07780a1.pdf]

# **Microscopic Insight into the Nanodiamond Polymer Composites: The Reinforcement, Structural, and Interaction Properties**

Muhan Wang<sup>a</sup>, Kaixuan Zhang<sup>a</sup>, Dongshuai Hou<sup>a,b,\*</sup>, Pan Wang<sup>a,b</sup>

a. Department of Civil Engineering, Qingdao University of Technology, Qingdao 266033, China;

b. Collaborative Innovation Center of Engineering Construction and Safety in Shandong Blue Economic Zone, Qingdao, 266033, China.

\* Corresponding author, Tel: +86 0532 85071329. Email: [dshou@outlook.com](mailto:dshou@outlook.com)

## SI Force Field Introduction

The interatomic interactions were described by the OPLS (Optimized Potentials for Liquid Simulations) all-atom force field.<sup>1,2</sup> The OPLS includes the pairwise and the bonding interaction. The pairwise interaction is composed two part of the short-range van der Waals (vdW) and the long-range electrostatic interaction. The vdW interaction is represented by 12-6 Lennard-Jones potential and the electrostatic interaction is represented by Coulombic potential. For the bonding interaction, it includes three components of bond stretching, angle bending and dihedral torsion. The OPLS force field is expressed as:

$$E_{total} = E_{bonds} + E_{angles} + E_{dihedrals} + E_{nonbonded} \quad (1)$$

$$E_{bonds} = \sum_{bonds} K_r (r - r_0)^2 \quad (2)$$

$$E_{angles} = \sum_{angles} K_\theta (\theta - \theta_0)^2 \quad (3)$$

$$E_{dihedrals} = \sum_{dihedrals} \left( \frac{V_1}{2} [1 + \cos(\varphi - \varphi_1)] + \frac{V_2}{2} [1 - \cos(2\varphi - \varphi_2)] + \frac{V_3}{2} [1 + \cos(3\varphi - \varphi_3)] + \frac{V_4}{2} [1 - \cos(4\varphi - \varphi_4)] \right) \quad (4)$$

$$E_{nonbonded} = \sum_{i>j} \left[ \epsilon_{ij} \left( \frac{\sigma^{12}}{r_{ij}^{12}} - \frac{\sigma^6}{r_{ij}^6} \right) + \frac{q_i q_j e^2}{4\pi\epsilon_0 r_{ij}} \right] \quad (5)$$

Where  $E_{total}$  is the total energy in the system which is equal to the energy of bond stretching ( $E_{bonds}$ ) plus angles shake ( $E_{angles}$ ) plus dihedrals shake ( $E_{dihedrals}$ ) plus pairwise ( $E_{nonbonded}$ ).

The parameters are supplied by TINKER software with open source. At the link:

<https://dasher.wustl.edu/tinker/distribution/params/oplsaa.prm> in the TINKER web site.

## SII The Stress-Strain Curve of Three Dimensions

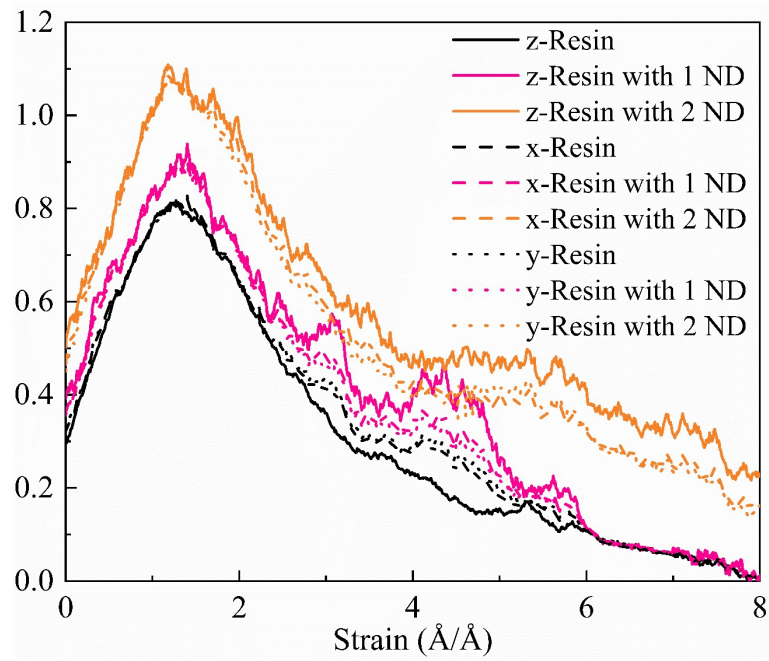

**Fig. SII.** Stress-strain relations of pure resin, resin composite with 1 ND, and resin composite with 2 ND in the x, y, z direction.

### SIII Time Evolution of Box Size

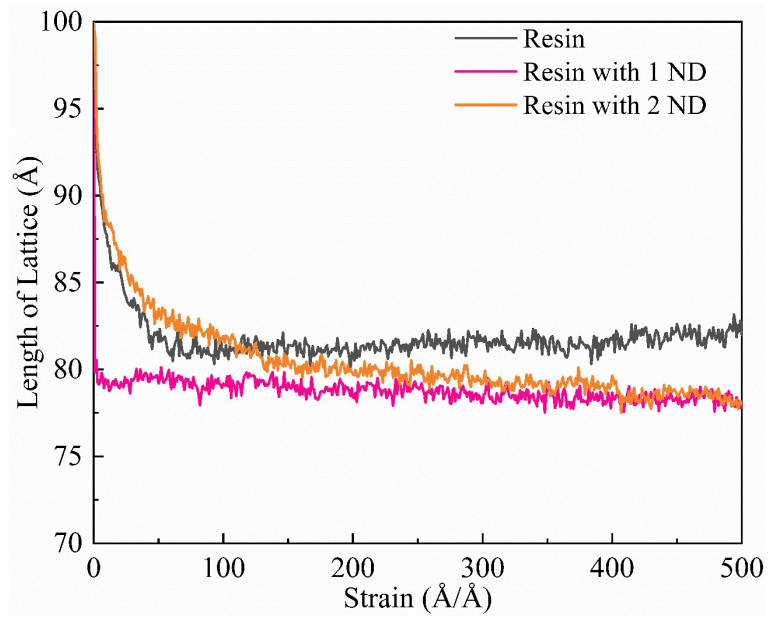

**Fig. SIII.** Box size evolution of pure resin, resin composite with 1 ND, and resin composite with 2 ND.

- (1) Ponder, J. W.; others. TINKER: Software Tools for Molecular Design. Version 2004.
  
- (2) Jorgensen, W. L.; Maxwell, D. S.; Tirado-Rives, J. Development and Testing of the OPLS All-Atom Force Field on Conformational Energetics and Properties of Organic Liquids. *J. Am. Chem. Soc.* **1996**, *118* (45), 11225–11236.
